# Supplementary material for: A promising approach to an environmentally friendly pest management solution: nanocarrier-delivered dsRNA towards controlling the destructive invasive pest Tuta absoluta
Source: Royal Society of Chemistry journal article supplement (doi:10.1039/d2en01076c), 2023-01-01
Supplement: d2en01076c1.pdf [file d2en01076c1.pdf]

## Supplementary Material

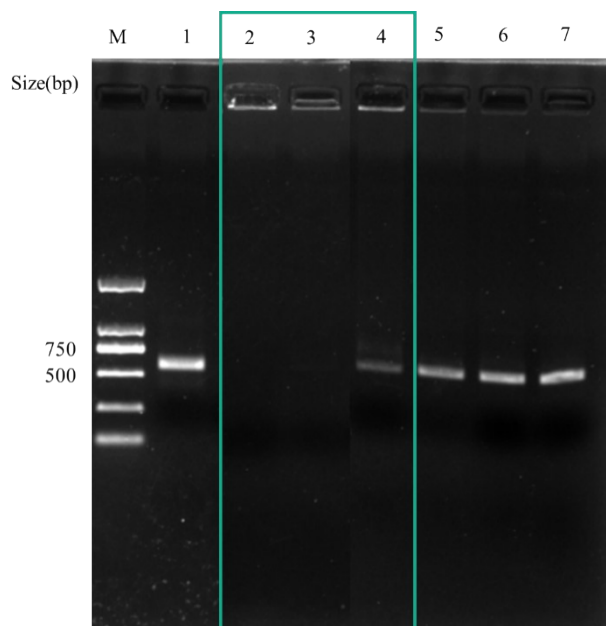

Fig. 1. Binding of dsRNA to chitosan solutions at different concentrations

25  $\mu$ g dsRNA was combined with 100  $\mu$ L CS. M: DNA Marker; 1: dsRNA; 2-7: The mass ratios of the dsRNA and CS were: 1.25:1, 12.5:1, 25:1, 50:1, 100:1, and 125:1. The dsRNA band was approximately 600 bp.

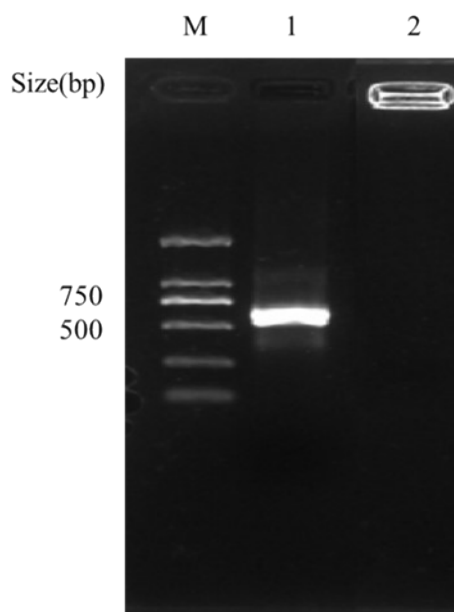

Fig. 2. Combination of dsRNA and SPC

1  $\mu$ g of dsRNA was combined with SPC in a mass ratio of 1:1. M: DNA Marker; 1: dsRNA; 2: dsRNA/SPC. The dsRNA band was approximately 600 bp.

Table 1 Sequences producing significant alignments

| Scientific Name          | Max Score | Total Score | Query Cover | E value | Per. Ident | Accession  |
|--------------------------|-----------|-------------|-------------|---------|------------|------------|
| <i>Carposina sasakii</i> | 72.3      | 72.3        | 13%         | 6e-08   | 90.14%     | CP053149.1 |
| <i>Pheosia tremula</i>   | 70.3      | 70.3        | 9%          | 2e-07   | 94.00%     | HG995397.1 |

|                                 |      |      |    |       |         |            |
|---------------------------------|------|------|----|-------|---------|------------|
| <i>Pheosia gnoma</i>            | 70.3 | 70.3 | 9% | 2e-07 | 94.00%  | FR989894.1 |
| <i>Marasmarcha lunaedactyla</i> | 60.3 | 60.3 | 6% | 2e-04 | 97.14%  | OV281346.1 |
| <i>Blastobasis adustella</i>    | 60.3 | 60.3 | 5% | 2e-04 | 100.00% | OU026116.1 |
| <i>Blastobasis lacticoella</i>  | 60.3 | 60.3 | 5% | 2e-04 | 100.00% | LR990043.1 |

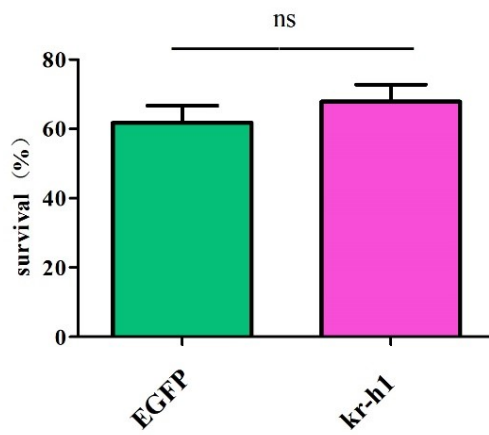

Fig. 3. Effects of foliar spraying *dsTakr-h1* on the survival rate of *N. tenuis*
